# Supplementary material for: Genetic analyses reveal population structure and recent decline in leopards ( Panthera pardus fusca ) across the Indian subcontinent
Source: PeerJ journal article supplement (doi:10.7717/peerj.8482), 2020-02-04

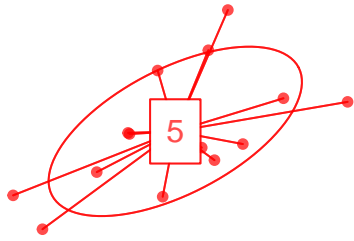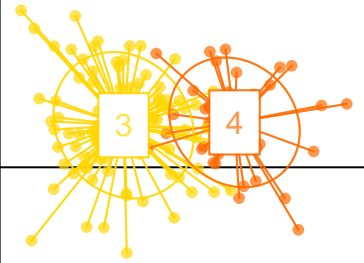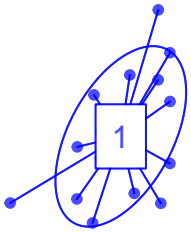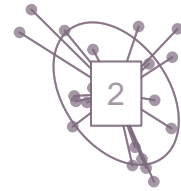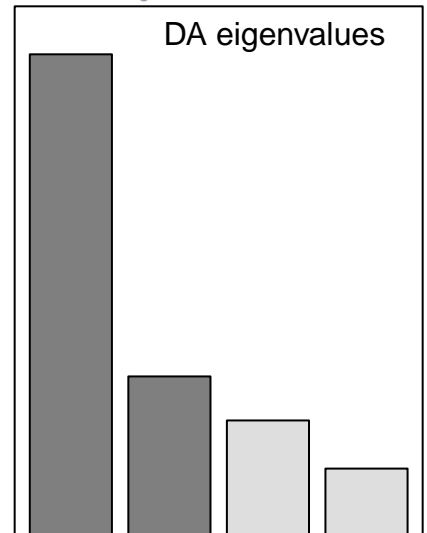

Supplement: 11._Bhatt_et_al_2019_Supplementary_Figure_2.pdf [file 11._Bhatt_et_al_2019_Supplementary_Figure_2.pdf]
