# Supplementary material for: Genetic analyses reveal population structure and recent decline in leopards (Panthera pardus fusca) across the Indian subcontinent
Source: PeerJ. 2020 Feb 4;8:e8482. doi: 10.7717/peerj.8482 (PMC7006512; doi:10.7717/peerj.8482)
Supplement: Data S2 [file peerj-08-8482-s005.xlsx]

## Sheet: Sheet1
SAMPLE ID	FCA 090_1	FCA 090_2	msFCA 052_1	msFCA 052_2	FCA126_1	FCA126_2	FCA 279_1	FCA 279_2	FCA 672_1	FCA 672_2	FCA 230_1	FCA 230_2	FCA 232_1	FCA 232_2	msFCA 441_1	msFCA 441_2	FCA 309_1	FCA 309_2	FCA 506_1	FCA 506_2	msFCA 453_1	msFCA 453_2	FCA 391_1	FCA 391_2	msHDZ 170_1	msHDZ 170_2
KL_XX_01	0	0	0	0	146	146	92	98	98	98	104	106	0	0	85	101	96	102	135	135	85	85	0	0	0	0
KL_XX_02	0	0	113	117	0	0	92	102	94	104	0	0	115	121	81	85	98	104	121	135	69	85	0	0	0	0
KL_XX_03	0	0	0	0	0	0	102	102	82	104	0	0	113	121	81	113	86	104	0	0	69	77	156	156	84	90
KL_XX_04	0	0	0	0	0	0	98	102	82	86	96	106	113	117	103	113	90	102	0	0	81	85	156	156	76	90
KL_XX_05	106	108	119	121	146	152	96	98	84	100	96	106	117	119	111	115	98	102	123	141	69	85	156	156	88	88
TN_XX_01	110	116	117	119	140	146	96	106	84	88	96	106	117	119	103	115	96	98	123	135	77	85	140	156	88	88
TN_XX_02	106	116	0	0	140	150	106	106	86	110	100	106	117	117	101	103	96	96	123	135	69	85	140	144	92	92
KA_XX_01	106	116	0	0	146	150	98	100	84	88	100	100	107	117	101	113	96	96	117	133	69	69	140	144	82	92
KA_XX_02	0	0	113	117	146	146	100	100	88	114	100	104	115	115	101	105	98	100	123	135	69	85	128	148	84	88
KA_XX_03	0	0	113	117	146	148	98	100	114	114	104	114	115	117	0	0	104	104	121	135	69	69	128	136	84	90
KA_XX_04	0	0	89	119	138	148	92	98	114	118	102	104	115	119	0	0	102	104	127	133	69	81	144	144	88	90
KA_XX_05	0	0	89	119	142	152	92	98	0	0	102	102	115	119	101	105	96	102	125	135	69	69	140	152	88	90
KA_XX_06	104	106	113	119	138	152	92	98	0	0	102	114	115	117	101	109	100	104	135	135	69	69	148	156	90	90
KA_XX_07	104	116	115	119	138	142	94	100	94	114	100	106	115	115	101	105	96	100	127	135	69	81	128	152	84	90
KA_XX_08	108	116	113	119	138	142	92	94	0	0	104	116	115	121	101	101	96	102	127	137	69	89	144	144	84	90
KA_XX_09	108	110	113	113	138	138	92	98	0	0	104	116	115	115	0	0	96	96	121	133	69	69	144	144	84	88
KA_XX_10	108	110	113	113	144	148	92	102	78	114	104	104	115	115	0	0	100	106	0	0	0	0	0	0	0	0
KA_XX_11	102	110	111	119	126	146	92	104	80	86	104	106	115	117	0	0	98	102	0	0	0	0	0	0	0	0
KA_XX_12	108	108	117	117	134	136	0	0	78	88	108	110	119	121	0	0	98	106	0	0	0	0	0	0	0	0
KA_XX_13	112	114	113	117	134	138	0	0	86	86	108	108	119	119	0	0	98	114	0	0	0	0	0	0	0	0
KA_XX_14	108	112	105	121	126	138	100	110	78	86	100	108	111	119	0	0	98	100	0	0	0	0	0	0	0	0
KA_XX_15	110	116	105	111	134	136	96	100	86	94	100	108	111	119	0	0	102	106	0	0	0	0	0	0	0	0
KA_XX_16	100	110	105	113	136	146	92	100	86	94	98	100	109	111	0	0	88	102	0	0	0	0	0	0	0	0
KA_XX_17	106	108	91	113	138	146	92	92	94	114	102	108	113	119	0	0	98	100	0	0	0	0	0	0	0	0
KA_XX_18	100	114	91	117	0	0	98	100	86	118	102	126	113	137	0	0	100	100	0	0	0	0	0	0	0	0
KA_XX_19	108	108	113	117	0	0	94	100	86	92	104	126	115	137	0	0	100	106	0	0	0	0	0	0	0	0
KA_XX_20	108	114	113	115	146	148	98	100	114	114	104	114	115	125	0	0	100	102	0	0	0	0	0	0	0	0
KA_XX_21	108	114	109	119	136	148	94	98	88	118	100	104	111	115	0	0	98	102	0	0	0	0	0	0	0	0
KA_XX_22	108	108	113	117	136	138	92	94	86	88	104	108	115	119	0	0	100	106	0	0	0	0	0	0	0	0
KA_XX_23	106	114	113	113	138	138	98	98	78	86	96	114	107	125	0	0	90	100	0	0	0	0	0	0	0	0
KA_XX_24	102	116	105	119	132	146	96	98	84	84	100	104	111	115	0	0	98	98	0	0	0	0	0	0	0	0
KA_XX_25	108	108	105	111	128	146	96	100	80	94	100	108	111	119	0	0	102	116	0	0	0	0	0	0	0	0
KA_XX_26	106	118	111	113	0	0	100	100	80	88	106	108	117	119	0	0	90	116	0	0	0	0	0	0	0	0
KA_XX_27	106	108	105	119	0	0	100	100	86	88	100	110	111	121	0	0	92	96	0	0	0	0	0	0	0	0
KA_XX_28	88	110	105	113	130	138	84	100	82	86	104	108	115	119	0	0	86	100	0	0	0	0	0	0	0	0
KA_XX_29	94	118	113	113	130	132	100	110	80	92	100	108	111	119	0	0	94	94	0	0	0	0	0	0	0	0
KA_XX_30	106	116	117	119	130	142	92	100	86	114	102	108	113	119	0	0	96	98	0	0	0	0	0	0	0	0
KA_XX_31	104	106	113	119	138	152	84	98	112	116	102	114	113	125	0	0	98	102	0	0	0	0	0	0	0	0
KA_XX_32	104	108	105	119	134	138	90	100	80	118	98	106	109	117	0	0	98	114	0	0	0	0	0	0	0	0
KA_XX_33	106	116	111	115	0	0	100	100	88	92	106	106	117	117	0	0	90	114	0	0	0	0	0	0	0	0
KA_XX_34	108	114	115	119	0	0	0	0	86	92	96	110	107	121	0	0	94	96	0	0	0	0	0	0	0	0
KA_XX_35	108	116	113	117	138	148	0	0	78	96	98	106	109	117	0	0	90	98	0	0	0	0	0	0	0	0
KA_XX_36	100	108	103	121	138	142	98	100	78	88	98	106	109	117	0	0	98	106	0	0	0	0	0	0	0	0
KA_XX_37	108	108	111	113	138	150	100	100	78	86	98	106	109	117	0	0	90	106	0	0	0	0	0	0	0	0
KA_XX_38	90	112	115	119	126	152	96	100	86	88	102	104	113	115	0	0	96	100	0	0	0	0	0	0	0	0
KA_XX_39	90	110	113	115	130	130	0	0	82	92	104	104	115	115	0	0	106	108	0	0	0	0	0	0	0	0
KA_XX_40	110	116	113	115	142	142	0	0	92	94	100	110	111	121	0	0	96	110	0	0	0	0	0	0	0	0
KA_XX_41	110	116	111	119	142	142	94	94	78	114	108	116	119	127	0	0	92	100	0	0	0	0	0	0	0	0
KA_XX_42	108	116	111	119	138	142	96	100	86	88	98	110	109	121	0	0	98	102	0	0	0	0	0	0	0	0
KA_XX_43	110	112	105	119	0	0	98	100	86	94	106	108	117	119	0	0	90	102	0	0	0	0	0	0	0	0
KA_XX_44	110	110	105	113	0	0	100	100	86	94	102	108	113	119	0	0	98	98	0	0	0	0	0	0	0	0
KA_XX_45	92	116	101	113	138	142	100	100	86	86	108	112	119	123	0	0	90	108	0	0	0	0	0	0	0	0
KA_XX_46	92	116	109	113	138	146	100	100	78	94	106	108	117	119	0	0	88	98	0	0	0	0	0	0	0	0
KA_XX_47	108	112	103	119	136	140	90	102	78	86	100	108	111	119	0	0	88	96	0	0	0	0	0	0	0	0
KA_XX_48	110	112	113	113	138	148	92	100	86	100	104	104	115	115	0	0	96	98	0	0	0	0	0	0	0	0
KA_XX_49	110	110	111	113	136	148	92	94	78	114	90	104	101	115	0	0	92	104	0	0	0	0	0	0	0	0
KA_XX_50	112	114	0	0	0	0	0	0	86	118	0	0	109	117	0	0	102	110	0	0	0	0	0	0	0	0
KA_XX_51	108	108	0	0	0	0	0	0	86	112	0	0	111	115	0	0	74	110	129	133	0	0	0	0	0	0
KA_XX_52	108	108	111	119	146	150	0	0	86	104	0	0	119	119	101	117	86	102	0	0	0	0	0	0	0	0
KA_XX_53	108	110	115	117	140	146	0	0	94	94	0	0	117	119	101	105	96	102	0	0	0	0	0	0	0	0
MH_XX_01	108	116	113	117	136	146	92	98	94	98	0	0	117	117	105	105	10	100	133	133	69	101	128	156	76	88
MH_XX_02	106	114	113	117	136	154	94	98	10	100	94	104	117	117	97	109	92	100	125	133	81	101	128	128	84	88
MH_XX_03	106	114	117	119	146	146	88	98	86	100	104	104	117	119	101	105	96	100	127	137	69	81	128	144	88	88
MH_XX_04	108	114	115	117	146	148	90	92	86	94	104	106	117	117	105	105	96	100	137	137	69	85	140	152	88	88
MH_XX_05	106	116	113	117	148	154	98	102	86	94	106	106	117	119	105	105	92	100	109	141	69	81	128	144	78	90
MH_XX_06	108	110	113	115	140	154	90	98	94	94	102	110	117	117	105	105	96	100	125	133	69	85	140	144	84	88
MH_XX_07	108	116	113	117	134	146	90	98	94	98	98	106	117	117	105	105	10	100	127	137	69	85	128	144	88	90
MH_XX_08	106	114	113	113	152	152	86	98	86	100	98	104	117	119	105	109	92	100	137	137	69	69	128	144	84	88
MH_XX_09	108	110	113	117	148	152	98	102	86	94	104	104	117	119	105	105	96	100	129	137	81	85	128	144	88	90
MH_XX_10	106	114	107	119	148	150	94	104	86	94	98	104	117	119	105	105	10	100	137	137	69	85	128	144	84	88
MH_XX_11	104	106	109	117	138	152	92	94	84	94	104	106	117	119	101	109	96	102	125	137	69	81	136	144	88	90
MH_XX_12	108	114	115	117	142	144	92	92	86	86	100	106	117	119	105	105	96	100	129	137	69	85	144	152	88	90
MH_XX_13	106	110	115	117	134	146	92	92	86	98	104	106	117	119	105	105	96	100	135	137	69	85	144	152	88	90
MH_XX_14	106	106	117	117	142	148	102	104	86	94	100	106	117	119	105	105	96	100	127	137	69	85	144	144	88	98
MH_XX_15	106	108	115	117	148	152	92	102	86	100	104	106	117	117	105	105	96	100	129	137	69	85	128	144	88	90
MH_XX_16	106	116	115	119	148	152	92	92	86	94	100	104	117	119	93	105	96	100	127	137	69	85	140	144	88	90
MH_XX_17	106	116	117	119	148	152	92	102	86	86	104	106	117	117	105	105	96	100	125	127	69	85	144	144	88	90
MH_XX_18	106	108	117	117	146	148	90	102	82	100	104	106	115	119	93	105	96	100	125	137	69	85	144	152	88	90
MH_XX_19	106	114	113	121	138	152	92	98	84	94	98	104	117	117	105	105	92	96	135	137	69	69	128	152	84	88
MH_XX_20	106	108	113	119	138	142	92	94	94	94	104	104	117	119	105	105	96	100	125	137	69	81	128	144	88	90
MH_XX_21	108	116	115	117	146	152	98	102	86	94	104	106	117	117	97	105	96	96	125	141	69	69	128	140	88	90
MH_XX_22	106	116	115	121	138	152	98	104	86	94	104	104	117	123	105	105	92	100	137	137	81	81	128	128	84	90
MH_XX_23	106	108	113	121	134	152	90	98	86	94	102	106	115	119	97	109	96	100	125	137	69	81	128	144	88	90
MH_XX_24	106	108	117	117	140	152	92	98	86	100	100	104	117	117	105	105	96	100	125	135	69	85	140	152	88	90
MH_XX_25	106	114	113	119	146	152	92	102	86	94	102	104	117	117	105	105	10	102	127	137	81	85	140	144	88	98
GJ_XX_01	106	114	117	117	140	148	102	106	86	100	102	104	117	117	105	105	92	102	137	137	69	89	140	144	88	98
MH_XX_26	106	114	115	117	150	152	98	104	94	94	104	106	117	117	105	105	10	100	127	137	69	81	128	144	84	88
MH_XX_27	106	108	115	119	142	152	98	100	86	100	102	106	115	119	97	109	96	100	135	137	69	81	128	140	90	90
MH_XX_28	108	116	115	119	146	152	102	102	86	86	104	106	117	119	105	105	96	100	137	137	69	85	144	152	88	90
MH_XX_29	108	114	113	115	134	152	82	104	94	94	100	106	117	117	105	105	10	100	137	137	69	69	148	152	88	90
MH_XX_30	106	114	113	117	134	138	94	94	100	100	104	106	117	117	97	109	92	100	125	137	81	85	128	152	84	98
MH_XX_31	106	114	117	119	146	148	88	98	86	100	98	104	117	119	105	105	92	100	127	137	69	81	128	144	84	88
MH_XX_32	106	108	117	117	142	152	90	98	86	88	104	104	115	119	93	109	96	100	125	137	69	81	140	144	88	90
MH_XX_33	116	116	117	117	138	152	102	102	86	94	102	106	117	119	93	101	96	96	127	137	69	69	148	152	90	90
MH_XX_34	106	116	115	117	142	152	92	104	84	98	104	104	117	123	105	105	96	96	137	149	69	85	144	152	84	90
MH_XX_35	106	106	119	121	144	148	102	102	84	98	104	106	115	119	101	105	96	100	149	149	69	69	128	152	84	88
MH_XX_36	106	108	117	119	140	146	86	102	84	92	104	106	113	117	105	105	96	100	151	151	69	85	128	140	90	90
MH_XX_37	100	106	117	119	128	146	86	90	88	94	106	106	109	115	95	105	98	100	121	159	73	81	144	148	86	98
MH_XX_38	104	106	111	121	128	150	96	98	88	88	106	106	109	117	99	103	96	98	121	123	69	73	140	144	86	90
MH_XX_39	0	0	103	117	142	150	100	108	88	90	0	0	109	123	89	107	94	102	121	123	69	77	148	156	82	86
MH_XX_40	0	0	103	117	142	148	90	100	90	94	0	0	109	117	89	113	98	98	121	123	73	81	156	156	88	88
MH_XX_41	104	118	0	0	148	152	0	0	92	94	0	0	111	117	87	113	98	102	121	137	85	85	156	156	86	88
MH_XX_42	104	118	0	0	146	152	0	0	88	92	0	0	109	111	87	103	76	98	123	135	69	85	156	156	86	88
MH_XX_43	0	0	0	0	146	150	96	98	88	90	100	110	115	117	105	107	76	102	121	137	69	85	156	156	88	90
MH_XX_44	0	0	0	0	146	150	92	98	88	90	100	110	115	117	103	107	76	102	123	135	69	85	156	156	86	88
MH_XX_45	108	108	0	0	134	150	98	98	88	92	106	110	115	115	0	0	76	96	103	137	69	85	0	0	82	88
AP_XX_01	114	116	0	0	140	142	98	98	90	92	106	106	115	117	0	0	92	96	109	115	69	81	0	0	82	84
AP_XX_02	108	116	111	117	146	148	98	100	82	102	104	106	113	117	101	105	0	0	115	121	69	85	152	156	86	88
AP_XX_03	108	116	117	119	140	146	98	106	92	96	96	106	115	121	101	105	0	0	115	133	69	69	144	156	84	86
TN_XX_03	106	108	113	119	140	140	98	106	90	92	96	108	115	121	105	105	96	102	121	133	81	85	136	144	90	96
TN_XX_04	106	110	115	119	148	148	98	100	86	94	98	108	115	119	105	105	76	108	121	135	69	85	140	148	76	94
MP_XX_01	108	110	105	115	148	152	100	100	86	92	98	116	109	119	105	109	76	104	121	135	81	85	0	0	84	88
MP_XX_02	108	114	103	105	144	158	84	100	92	92	112	116	109	113	105	109	76	104	115	121	81	85	0	0	86	90
MP_XX_03	108	116	103	113	144	152	92	100	86	108	104	112	115	117	97	105	10	104	115	137	69	81	128	156	0	0
MP_XX_04	116	118	113	113	140	144	92	100	86	94	110	110	105	117	97	105	10	100	137	137	85	85	128	144	0	0
MP_XX_05	108	116	113	113	142	146	92	96	86	86	100	110	115	117	101	105	98	100	115	137	69	85	128	144	88	88
MP_XX_06	106	108	113	115	142	150	102	104	0	0	0	0	0	0	101	115	98	98	0	0	69	81	0	0	88	90
MH_XX_46	104	106	113	117	0	0	0	0	0	0	0	0	0	0	105	115	0	0	0	0	81	81	0	0	88	96
MP_XX_07	106	114	111	117	0	0	0	0	0	0	0	0	111	117	0	0	0	0	123	125	73	81	152	156	0	0
MP_XX_08	106	118	113	119	0	0	0	0	0	0	104	108	117	121	0	0	0	0	123	135	73	81	0	0	0	0
MP_XX_09	108	108	111	115	148	150	0	0	0	0	0	0	113	117	0	0	0	0	135	137	81	85	0	0	0	0
MP_XX_10	108	116	113	113	148	148	0	0	10	100	0	0	0	0	0	0	96	102	137	141	85	85	0	0	0	0
MP_XX_11	106	116	113	115	148	154	0	0	10	100	0	0	0	0	0	0	96	106	137	141	77	85	0	0	0	0
MP_XX_12	106	106	105	117	138	154	0	0	90	100	0	0	0	0	0	0	96	106	121	141	69	85	0	0	0	0
GJ_XX_02	108	114	105	111	150	150	96	98	86	90	98	108	109	113	89	101	96	96	121	133	69	69	156	156	84	88
RJ_XX_01	108	108	117	119	150	150	102	106	84	86	98	104	111	117	89	105	96	102	135	139	69	85	148	156	76	94
RJ_XX_02	108	114	113	119	150	150	102	102	84	86	0	0	117	121	89	113	96	102	109	141	69	85	0	0	86	88
RJ_XX_03	106	116	111	119	150	152	94	104	86	94	0	0	117	119	89	89	102	104	0	0	69	85	0	0	76	88
RJ_XX_04	106	106	99	119	0	0	96	106	86	88	0	0	111	121	89	111	86	102	0	0	85	85	0	0	76	78
HP_XX_103	114	114	113	113	146	146	90	100	84	84	100	100	117	117	97	109	100	100	135	143	69	81	144	144	84	84
HP_XX_128	106	106	113	113	146	146	0	0	84	84	100	100	115	115	0	0	100	100	135	135	69	81	0	0	84	84
HP_XX_11	102	102	0	0	146	146	90	98	84	84	100	100	115	115	0	0	90	90	0	0	69	81	0	0	84	84
HP_XX_27	106	106	113	113	146	146	0	0	84	84	100	100	117	117	113	113	100	106	137	143	69	81	0	0	84	84
HP_XX_33	106	106	111	121	148	148	90	96	84	84	104	104	117	117	97	97	90	100	123	123	69	81	144	144	84	84
HP_XX_36	106	106	111	121	154	154	90	90	84	84	100	100	0	0	89	109	90	100	143	143	81	81	136	136	98	116
HP_XX_71	108	114	113	113	142	142	80	86	84	84	102	102	0	0	0	0	106	106	141	141	81	81	132	144	118	118
HP_XX_77	114	114	113	113	142	146	82	86	84	84	100	100	0	0	97	113	106	106	141	141	81	81	132	144	118	118
RJ_XX_05	106	114	99	113	0	0	90	96	84	88	0	0	111	117	97	111	90	100	135	143	69	85	144	156	78	84
JH_XX_01	106	108	111	119	140	140	92	92	86	86	104	108	117	117	0	0	104	106	123	129	69	85	124	156	82	84
WB_XX_01	106	118	111	119	146	146	92	104	86	86	104	110	117	119	93	109	98	106	125	135	69	85	128	140	84	88
WB_XX_02	108	118	111	117	146	148	98	98	86	92	104	110	111	119	101	105	98	102	125	133	69	73	140	152	84	90
AS_XX_01	106	110	119	119	152	154	98	98	88	92	0	0	111	115	85	105	98	102	125	141	73	85	152	156	76	84
AS_XX_02	106	106	119	119	152	152	98	98	104	104	0	0	115	115	89	89	102	102	141	141	89	89	156	156	88	88
